# Supplementary material for: Scoring Enzootic Pneumonia-like Lesions in Slaughtered Pigs: Traditional vs. Artificial-Intelligence-Based Methods
Source: MDPI journal article supplement (doi:10.3390/pathogens12121460), 2023-12-17
Supplement: s1 [file s1]

**Table S1:** Lobe-specific capacity. Considering that lung lobes are not all the same size, Christensen *et al.* (1999) assigned a specific weight to each lobe (expressed as percentage of the entire pulmonary capacity), as reported in the following Table.

| <b>Lung lobe</b>                              | <b>Percentage of the entire pulmonary capacity,<br/>as assigned by Christensen <i>et al.</i> (1999)</b> |
|-----------------------------------------------|---------------------------------------------------------------------------------------------------------|
| Cranial lobe of the left lung                 | 5                                                                                                       |
| Middle (cardiac) lobe of the left lung        | 6                                                                                                       |
| Diaphragmatic (caudal) lobe of the left lung  | 29                                                                                                      |
| Cranial lobe of the right lung                | 11                                                                                                      |
| Middle lobe of the right lung                 | 10                                                                                                      |
| Diaphragmatic (caudal) lobe of the right lung | 34                                                                                                      |
| Accessory lobe                                | 5                                                                                                       |
